# Supplementary material for: Hemostatic findings of pleural fluid in dogs and the association between pleural effusions and primary hyperfibrino(geno)lysis: A cohort study of 99 dogs
Source: PLOS journal article supplement (doi:10.1371/journal.pone.0192371), 2018-02-20
Supplement: S1 (10.1371/journal.pone.0192371.s001) [file journal.pone.0192371.s001]

# Hemostatic findings of 12.01.2018

*by* Andrea Zoia

---

**Submission date:** 12-Jan-2018 12:16PM (UTC+0100)

**Submission ID:** 902113056

**File name:** Revised\_Manuscript.doc (347K)

**Word count:** 7326

**Character count:** 42713

1 **Hemostatic findings of pleural fluid in dogs and the**  
2 **association between pleural effusions and primary**  
3 **hyperfibrinogenolysis: a cohort study of 99 dogs**

4

5 Andrea Zoia<sup>1\*</sup>, Michele Drigo<sup>2</sup>, Christine J. Piek<sup>3</sup>, Paolo Simioni<sup>4</sup>, Marco Caldin<sup>5</sup>

6

7 <sup>1</sup> Department of Internal Medicine, <sup>2</sup> San Marco Veterinary Clinic, Padua, Italy

8 <sup>2</sup> Department of Medicina Animale, Produzione e Salute, Padua University, Legnaro, Italy

9 <sup>3</sup> <sup>1</sup> Department of Clinical Sciences of Companion Animals, Faculty of Veterinary Medicine,  
10 Utrecht University, Utrecht, The Netherlands

11 <sup>4</sup> Department of Cardiologic, Thoracic and Vascular Sciences, University of Padua Medical  
12 School, Padua, Italy

13 <sup>5</sup> Department of Clinical Pathology, <sup>62</sup> Laboratorio d'Analisi Veterinarie San Marco, Padua, Italy

14

15 \*Corresponding author

16 E-mail: [zoia.andrea06@googlemail.com](mailto:zoia.andrea06@googlemail.com) (AZ)

17

## 18 Abstract

19 The primary objective of this study was to determine if activation of coagulation and fibrinolysis  
 20 occurs in canine pleural effusions. Thirty-three dogs with pleural effusions of different origin  
 21 were studied. Pleural effusion fibrinogen concentrations were significantly lower, while pleural  
 22 fibrin-fibrinogen degradation products (FDPs) and D-dimer concentrations were significantly  
 23 higher than those in plasma ( $P < 0.001$  for all comparisons). These results show that, in canine  
 24 pleural fluids, there is evidence of coagulation activation and fibrinolysis. The secondary aims of  
 25 the current study were to determine if primary hyperfibrinolysis ([PHF] i.e., elevated plasma  
 26 FDPs with a normal D-dimer concentrations), occurs in dogs with pleural effusion, and whether  
 27 the presence of a concurrent inflammatory process may have activated the hemostatic cascade,  
 28 with its intrinsically linked secondary hyperfibrinolysis, masking the concurrent PHF. The  
 29 previously 33 selected dogs with pleural effusion (group 1) were compared to two control  
 30 groups of 33 healthy (group 2) and 33 sick dogs without pleural effusion (group 3). Serum  
 31 fibrinogen, FDPs, D-dimer, C-reactive protein (CRP), fibrinogen/CRP ratio, and frequency of  
 32 PHF were determined. Fibrinogen, FDPs, D-dimer and CRP concentrations in group 1 were  
 33 significantly increased compared to group 2 ( $P < 0.001$  for all comparisons). FDPs and CRP  
 34 concentrations in group 1 were also significantly increased compared to group 3 ( $P = 0.001$  and  
 35  $P < 0.001$ , respectively). The fibrinogen/CRP ratio was significantly decreased in group 1  
 36 compared to groups 2 and 3 ( $P < 0.001$  for both comparison). The frequency of PHF was  
 37 significantly higher in group 1 compared to groups 2 ( $P = 0.004$ ), but not compared to group 3.  
 38 These results support the hypothesis that PHF occurs significantly more often in dogs with  
 39 pleural effusion compared to healthy dogs. Nevertheless, the decrease in the fibrinogen/CRP  
 40 ratio in group 1 compared to group 3, considering the higher FDPs and similar D-dimer

41 concentrations, would suggest that PHF is also more frequent in dogs with pleural effusion  
42 compared to sick control dogs, and that this phenomenon is hidden due to concurrent secondary  
43 hyperfibrinolysis.  
44

## 45 Introduction

46 Fibrinolysis is the process whereby stable fibrin strands are broken down by plasmin [1].  
47 Localized fibrinolysis in response to thrombosis is necessary for the re-establishment of blood  
48 flow, and has been termed physiologic fibrinolysis [2]. Pathologic hyperfibrinolysis occurs in  
49 disease syndromes that induce increased concentrations of plasminogen activators, decreased  
50 concentrations of plasminogen inhibitors, or a combination of both [3]. Primary hyperfibrinolysis  
51 (PHF), also sometimes named primary hyperfibrinogenolysis [2,4,5], or pathologic fibrinolysis,  
52 [2] develops independently of intravascular activation of coagulation, and plasmin is formed  
53 without concomitant formation of thrombin [6]. In PHF, the production of plasmin within the  
54 general circulation overwhelms the neutralizing capacity of the antiplasmins, causing generalized  
55 fibrinogenolysis, increased production of fibrin-fibrinogen degradation products (FDPs),  
56 degradation of coagulation factors V, VIII, IX, XI [4], and degradation of any pre-existing fibrin  
57 localized in thrombi and hemostatic clots [4,6,7], potentially leading to severe bleeding [2].  
58 Besides an excessive serum plasmin concentration, other enzymes such as serum tryptase or non-  
59 plasmic polymorphonuclear elastase have been reported as possible causes of PHF, when their  
60 serum concentration overwhelms the neutralizing capacity of the antiplasmins [8-10]. In humans,  
61 this has been associated with acute conditions, such as surgical procedures [11], shock [4], liver  
62 transplantation [12], acute leukaemia [13], or treatment with thrombolytic drugs. It can also be  
63 observed in chronic conditions such as tumours [14], chronic liver disease [15], or following  
64 peritoneovenous shunting [16-19]. Secondary or “reactive” hyperfibrinolysis, on the other hand,  
65 is a consequence of activation of coagulation causing generation of thrombin which stimulates  
66 the endothelium to produce an increased amount of tissue plasminogen activator [6]. Secondary  
67 fibrinolysis is present in virtually every patient with disseminated intravascular coagulation

68 (DIC), as it is an appropriate response to persistent thrombin generation [2]. Because “cross-talk”  
69 between the inflammatory and hemostatic systems may be responsible for the activation of  
70 hemostasis associated with systemic inflammation [20,21], secondary or “reactive”  
71 hyperfibrinolysis, is often present in patients with inflammatory diseases.

72 Results of coagulation tests, more specifically FDPs and D-dimer, may help differentiate  
73 between either primary or secondary hyperfibrinolysis. During PHF, the production of FDPs <sup>2</sup>  
74 increased but the production of D-dimer is not [4]. Therefore, having elevated plasma FDPs with  
75 a normal D-dimer concentration has been suggested in human medicine as a possible indicator of  
76 PHF in the clinical setting [4,8,9]. Recently, using this criterion, we have demonstrated that dogs  
77 with ascites, above all when resulting from right-sided congestive heart failure, <sup>1</sup>have  
78 abnormalities in their coagulation tests, suggesting PHF [22,23].

<sup>12</sup>  
79 Pleural effusion is the pathological accumulation of fluid in the pleural space, which is  
80 classified following <sup>1</sup>its pathophysiology of formation as exudate, transudate, chylous, and  
81 hemorrhagic pleural effusions [24]. Exudates <sup>1</sup>form secondary to increased permeability of the  
82 pleural surface affected by inflammatory processes or neoplasia, while transudates <sup>1</sup>are the result  
83 of systemic disorders <sup>1</sup>altering Starling forces and form across a normal pleural surface [24,25].  
84 Chylous effusions usually occur due to thoracic duct leak of lymph rich in triglycerides. This  
85 lymph forms from the reabsorption of the interstitial fluid of the lower extremities, abdomen  
86 (including intestinal lacteals), and thorax and is generally similar to plasma. Hemorrhagic pleural  
87 effusions occur secondary to the accumulation of blood in the pleural cavity. Consequently, all  
88 pleural effusions contain plasma or an exudate or an ultrafiltrate of plasma. Therefore, pleural  
89 effusions may contain all of the proteins/enzymes that are present in plasma, <sup>47</sup>including those that  
90 participate in coagulation and fibrinolysis, as already demonstrated for ascitic fluids [26]. Fluids

1 of virtual cavities, of which a pleural effusion is a pathological manifestation, need to be without  
2 clots to allow smooth sliding of organs over each other, and therefore clots need to be rapidly  
3 lysed. The above statement is supported by the clinical observation that pleural effusions rarely  
4 form clots *in vivo* as shown in an experiment in dogs in which the inoculation of blood or a  
5 solution containing fibrinogen and thrombin into the pleural cavity caused the activation of the  
6 coagulation system, followed by fibrinolysis [27].

7 Therefore, the primary objective of the study reported here was to determine if coagulation  
8 and fibrinogenolytic/fibrinolytic activity (i.e., low fibrinogen and elevated FDPs and/or D-dimer)  
9 occurs in any type of canine pleural effusion. The secondary objectives of this study were to  
10 determine if systemic clotting abnormalities suggesting PHF (i.e., elevated plasma FDPs with a  
11 normal D-dimer concentration) occurs in these dogs, and whether an inflammatory process  
12 present in these dogs may have activated the hemostatic cascade, along with its intrinsically  
13 linked secondary hyperfibrinolysis, possibly masking concurrent PHF.

104

## 105 **Materials and Methods**

### 106 **Animals**

107 In this cohort study, the fibrinogenolytic/fibrinolytic activity of pleural effusions and the  
108 frequency of PHF in dogs with pleural effusion was compared to control dogs without pleural  
109 effusion. Group 1 included dogs with any type of pleural effusion, confirmed by thoracic  
110 radiography, ultrasonography or computer tomography, which consecutively presented to the  
111 San Marco Veterinary Clinic from September 2011 to February 2014. Dogs were only included  
112 in the study if the pleural effusion was collected and analyzed, and the pathophysiologic cause of  
113 the pleural effusion was determined. Two control groups were created. Group 2 included



114 clinically-healthy dogs coming to the clinic for routine annual check-ups, elective surgery, blood  
115 donor health screening programs, and pre-breeding examinations, and group 3 included sick dogs  
116 without pleural effusion. Dogs in both groups 2 and 3 were chosen with the use of the electronic  
117 medical database <sup>20</sup> P.O.A System-Plus 9.0<sup>®</sup> from all dogs <sup>20</sup> that presented to the San Marco  
118 Veterinary Clinic in the period between May 2004 and February 2014 using the following  
119 procedure. All control <sup>3</sup> dogs were individually matched to group 1 dogs for age ( $\pm 6$  months), sex  
120 (including neuter status), and breed. When a breed match of the same age and sex of a dog in  
121 group 1 was not found in the database, a dog with similar weight ( $\pm 5$  kg) was included instead.  
122 The control <sup>3</sup> dogs from groups 2 and 3 were selected as closely as possible to the admission date  
123 of the corresponding group 1 dog to reduce drift in the laboratory results. When two or more  
124 dogs fulfilled these criteria, the choice was randomly made by the computer system P.O.A  
125 System-Plus 9.0<sup>®</sup>. Dogs of all three groups were included in the study only if <sup>1</sup> there was a  
126 complete medical record, including history and results of physical examination, complete blood  
127 count (including blood smear examination), serum biochemistry analysis, coagulation profile  
128 analysis, and urinalysis. For groups 1 and 3, the determination of a specific diagnosis for the  
129 presenting complaint was also required for inclusion in the study. Dogs of all three groups were  
130 excluded from the study if they presented with a concomitant abdominal effusion or <sup>1</sup> if they had  
131 been treated with plasma, plasma derivate or anticoagulant therapy/intoxication within 30 days  
132 before study enrolment.

133

### 134 **Pleural effusion classification in group 1 dogs**

135 Pleural effusions in group 1 dogs were <sup>1</sup> classified according to their pathophysiology of  
136 formation. In accordance with the Starling's law [28], transudates result from decreased colloid



137 osmotic pressure (COP) (i.e., dogs with severe hypoproteinemia) or increased hydrostatic  
138 pressure (i.e., dogs with diseases causing venous hypertension), and exudates result from  
139 increased vascular permeability (i.e., dogs with inflammatory or neoplastic diseases directly  
140 involving the thoracic wall and/or serosal surfaces). Since COP poorly correlates with albumin in  
141 sick human patients [29], while correlating well with serum total protein in healthy dogs [30,31],  
142 hypoproteinemia was used to help identify diseases causing a decreased COP. Pleural effusion  
143 caused by <sup>1</sup> blood vessel rupture was classified as a hemorrhagic effusion (i.e., dogs with  
144 <sup>1</sup> iatrogenic, traumatic or spontaneous intra-thoracic <sup>57</sup> bleeding). Finally, <sup>70</sup> chylous effusions resulted  
145 from disruption of the thoracic duct or its tributaries [32]. Fluid triglycerides >110 mg/dL and  
146 fluid to serum triglyceride ratio > 1 were also used to identify diseases causing chylous effusion  
147 [33,34]. Diagnosis of the disease causing the pleural effusion <sup>1</sup> was used as the criterion standard  
148 to establish the pathophysiology of the pleural fluid formation.

## 150 Pleural effusion collection and measurement of parameters

151 A 10 mL sample of pleural effusion was collected at the time of presentation from each  
152 group 1 <sup>1</sup> dog via ultrasonographic-guided thoracentesis. Fluid samples were transferred in plastic  
153 tubes with K<sub>3</sub>-EDTA for the determination of haematocrit and total nucleated cell count, and in  
154 plain glass <sup>1</sup> tubes for the determination of total protein with an automated chemistry <sup>59</sup> analyzer  
155 (Olympus AU 2700, Olympus Diagnostics, Hamburg, Germany). A board certified clinical  
156 pathologist performed the cytology examinations on all fluid samples. Fluid samples were also  
157 transferred in a 3.5 mL <sup>1</sup> plastic tubes with 3.2% sodium citrate (final ratio of volume of  
158 anticoagulant to volume of blood, 1:9) (3.2% sodium citrate Vacuette<sup>®</sup> <sup>1</sup> 3.5 mL, Grenier Bio-One,  
159 Kremsmünster, Austria) for the measurement of coagulation variables (see next paragraph).

160

## 161 Plasma and pleural effusion coagulation parameter analysis

162 Coagulation profile analysis was performed for all dogs and included the determination of  
163 fibrinogen, FDPs, and D-dimer. A venous blood sample was taken from the <sup>1</sup>cephalic (for  
164 medium/large-size dogs) or jugular (for small size-dogs) veins for routine laboratory analysis. In  
165 dogs of group 1, <sup>1</sup>venous blood samples were taken at the same time ( $\pm 2$  hours) as the pleural  
166 effusion samples were collected. A 3.5 mL aliquot of this blood was transferred in a plastic tube  
167 with <sup>1</sup>3.2% sodium citrate with a final ratio of volume of anticoagulant to volume of blood of 1:9  
168 (3.2% sodium citrate Vacuette<sup>®</sup> <sup>1</sup>3.5 mL, Grenier Bio-One, Kremsmünster, Austria) for the  
169 measurement of coagulation parameters. Tubes with sodium citrate were centrifuged at 1,950 g  
170 for 5 min, plasma was harvested, and coagulation profile analysis was performed within 1 hour  
171 after blood sample collection. Pleural effusion and plasma <sup>1</sup>fibrinogen concentrations were  
172 determined via quantitative assays (STA Fibrinogen, Diagnostica Stago, Asnières sur Seine,  
173 France), with <sup>40</sup>an automated analyzer (STA-R Evolution, Diagnostica Stago, Roche, Basel,  
174 Switzerland), <sup>1</sup>The detection limit for fibrinogen concentration was 60 mg/dL; for statistical  
175 analysis values below this concentration were <sup>1</sup>entered into the data sheet as 59 mg/dL. Pleural  
176 effusion and <sup>1</sup>plasma concentrations of FDPs were measured with an immunoturbidimetric  
177 quantitative assay (STA - Liatest<sup>®</sup> FDP, Diagnostica Stago, Asnières sur Seine, France), with <sup>40</sup>an  
178 automated analyzer (STA-R Evolution, Diagnostica Stago, Roche, Basel, Switzerland). Pleural  
179 effusion and <sup>1</sup>plasma D-dimer concentrations were determined via a validated [35],  
180 <sup>43</sup>immunoturbidimetric quantitative assay (Tina-quant D-Dimer, Roche Diagnostic GmbH,  
181 Mannheim, Germany), with an automated analyzer (Olympus AU 2700, Olympus Diagnostics,  
182 Hamburg, Germany).

183

184 All collection procedures were performed for the dog's benefit and for standard  
185 diagnostic and monitoring purposes. Previous informed written consent was obtained from all  
186 dog owners. Anaesthesia, euthanasia, or any kind of animal sacrifice were not required for any  
187 part of the study.

188

189

## 190 **Primary hyperfibrinolysis**

191 Primary hyperfibrinolysis was defined as a discordant result between changes in  
192 plasma FDPs and D-dimer concentrations, with FDPs above the reference interval (reference  
193 interval, < 5 µg/mL) and D-dimer within the reference interval (reference interval 0.01 to 0.34  
194 µg/mL).

195

## 196 **C-reactive protein**

197 The serum C-reactive protein (CRP) concentration was measured with an automated  
198 analyzer (Olympus AU 2700, Olympus Diagnostics, Hamburg, Germany), using an  
199 immunoturbidimetric assay validated in humans (CRP OSR6147, Olympus Life and Material  
200 Science Europe GmbH, Lismeehan, O'Callaghan's Mills, Ireland), that showed a good  
201 correlation ( $r = 0.98$ ) [36] with those of a previously validated canine-specific ELISA (Tridelta  
202 Phase range canine CRP kit, Tridelta Development Ltd., Brey, Ireland).

203

## 204 **Statistical analysis**

205 <sup>66</sup> Kolmogorov-Smirnov test was used to assess if data were normally distributed. In group  
206 1 only (dogs with pleural effusion), <sup>1</sup> fibrinogen, FDPs, and D-dimer concentrations were  
207 compared between pleural effusion and venous blood via the Wilcoxon signed ranks test. Serum  
208 fibrinogen, plasma FDPs, plasma D-dimer, serum CRP concentrations, and the serum  
209 fibrinogen/CRP ratio were then compared between <sup>2</sup> group 1, group 2 (healthy dogs), and group 3  
210 (sick dogs without pleural effusion) via ANOVA (fibrinogen concentrations) followed by  
211 Tamhane post-hoc test or via Kruskal-Wallis tests (D-dimer, FDPs, CRP concentrations, and  
212 fibrinogen/CRP ratio) followed by a Mann-Whitney test. The <sup>55</sup> Fisher's exact test was used to  
213 assess differences among and between the three groups in frequency of PHF as previously  
214 defined (i.e., elevated plasma concentration of FDPs along with a normal plasma D-dimer  
215 concentration).

216 <sup>46</sup> For all statistical analyses, values of  $P < 0.05$  were considered significant.

217

## 218 Results

### 219 Animals

220 During the study period, 156 dogs with any type of pleural effusion, as confirmed by  
221 thoracic radiography, ultrasonography or computer tomography, presented to the clinic. In 59 of  
222 these dogs, pleural effusion and venous blood samples were collected at presentation. Twenty-six  
223 dogs (nine due to rodenticide exposure, 14 with concurrent abdominal effusion, and three due to  
224 lack of identification of the underlying <sup>1</sup> cause for the pleural effusion formation) were excluded  
225 from further analysis. The remaining 33 dogs entered the study in group 1. Eighteen dogs were  
226 male (15 sexually intact and three neutered) and 15 female (11 sexually intact and four spayed).  
227 There were five mongrel dogs, three German shepherd dogs and three Labrador retrievers. Each

of the following breeds was represented by two dogs: boxer, Deutsch kurzhaar, greyhound, pug, Rottweiler, and West Highland white terrier. The remaining nine dogs were of other breeds. One dog had pleural effusion due to decreased COP, four due to increased hydrostatic pressure, 20 due to increased vascular permeability, four due to chylous effusion, and four due to haemorrhage. The underlying diseases leading to pleural effusion formation are summarized in Table 1.

Group 2 (clinically healthy dogs) was 100% matched for sex and neutering status to group 1. Group 2 was 76% breed matched to group 1; the breed match was incomplete in 8 out of 33 dogs.

Group 3 (sick dogs without pleural effusion) was 100% matched for sex and neutered status to group 1. Group 3 was 91% breed matched to group 1; breed match was incomplete in 3 out of 33 dogs. Causes of sickness included gastrointestinal disorders (n = 6), brain diseases (5), endocrinopathies (4), sepsis and infectious diseases (5), neoplastic diseases (2), compression of the spinal cord by intervertebral disks (2), protein losing nephropathy (2), and other causes (6).

There was no statistical difference regarding age between groups 1 ( $7.36 \pm 4.13$  years; range, 0.33-16.42 years), group 2 ( $7.05 \pm 4.10$  years; range, 0.33-14.75 years) and group 3 ( $7.30 \pm 4.06$  years; range, 0.33-16.42 years;  $F = 0.053$ ;  $P = 0.95$ ).

**Table 1. Causes of pleural effusions formation in 33 dogs with pleural effusion**

| Group 1<br>Dogs with pleural effusion<br>(n = 33) |                                                             |                                                       |                                   |                              |
|---------------------------------------------------|-------------------------------------------------------------|-------------------------------------------------------|-----------------------------------|------------------------------|
| ↓ COP<br>transudates<br>(n = 1)                   | ↑ HP<br>transudates<br>(n = 4)                              | Exudates<br>(n = 20)                                  | Chylous PE<br>(n = 4)             | Hemorrhagic<br>PE<br>(n = 4) |
| PLE (1)                                           | Neoplasia non<br>directly involving<br>the pleural surfaces | Pyothorax (11)<br>Neoplasia directly<br>involving the | Idiopathic (3)<br>Cardiogenic (1) | Malignancies (4)             |



|  |                        |                                           |  |  |
|--|------------------------|-------------------------------------------|--|--|
|  | (3)<br>Cardiogenic (1) | pleural surfaces (8)<br>Non septic PE (1) |  |  |
|--|------------------------|-------------------------------------------|--|--|

247

248 ↓ COP, decreased colloid osmotic pressure; ↑ HP, increased hydrostatic pressure; PLE, protein  
249 losing enteropathy; PE, pleural effusion

250

## 251 **Pleural effusion and plasma coagulation parameters analysis in dogs** 252 **of group 1**

253 Pleural effusion fibrinogen concentrations (median = 59 mg/dL; range: 59-59) were  
254 significantly lower ( $P < 0.001$ ) than those in the plasma (median = 419 mg/dL; range: 131-1406;  
255 reference interval: 152-284 mg/dL; Fig 1), and they were below the instrument detection limit  
256 (i.e., < 60 mg/dL) in all 33 dogs. When the pleural effusion fibrinogen concentration of each dog  
257 was compared to its matching plasma value, the pleural effusion fibrinogen concentration was  
258 lower than the plasma sample in all dogs.

259 The quantitative FDP concentrations in the pleural effusion (median = 151 mg/dL; range:  
260 0.69-151) were significantly ( $P < 0.001$ ) higher than plasma quantitative FDP concentrations  
261 (median = 5.55 mg/dL; range: 0.83-108.47; Fig 2), and they were higher than the plasma  
262 reference value (< 5 µg/mL) in all 33 pleural effusions. When the pleural effusion of quantitative  
263 FDPs concentration of each dog was compared to its matching plasma value, the pleural effusion  
264 FDPs concentration was lower than the plasma sample in all dogs.

265 Pleural effusion D-dimer concentrations were significantly ( $P < 0.001$ ) higher (median:  
266 3.84 µg/mL; range: 0.05-9.61) than they were in the plasma (median: 0.07 µg/mL; range: 0.01-  
267 7.69; Fig 3), and they were higher than the plasma reference interval (0.01-0.34 µg/mL) in 28 out  
268 of the 33 pleural effusions. When the pleural effusion D-dimer concentration of each dog was



269 compared <sup>1</sup>to its matching plasma value, the pleural effusion D-dimer concentration was higher  
270 than the plasma sample concentration in 32 cases and lower in one case (i.e., in a hemorrhagic  
271 pleural effusion).

272 In conclusion, all the pleural effusions had non-measurable fibrinogen concentrations and  
273 all the 33 pleural effusions had at least one fibrin/<sup>1</sup>fibrinogenolytic marker above the reference  
274 interval of what is normal for a plasma sample.

275

276 **Fig 1. Tukey boxplots of plasma and pleural effusion fibrinogen concentrations of the 33**  
277 **dogs of group 1.** <sup>39</sup><sup>a,b</sup>Data distributions with different letters are significantly different ( $P < 0.001$ ).

278 The bottom and top of the box are the 1<sup>st</sup> and 3<sup>rd</sup> quartiles; the median is the band inside the box.

279 <sup>18</sup>Whiskers correspond to the lowest datum still within 1.5 interquartile range of the lower quartile,

280 and the highest datum still within 1.5 interquartile range of the upper quartile. Circles and stars

281 are outlier and extreme <sup>1</sup>outlier values (more than 1.5 and 3 interquartile range away from the  
282 closest end of the box, respectively).

283

284 **Fig 2. Tukey boxplots of plasma and pleural effusion quantitative FDPs concentrations of**  
285 **the 33 dogs of group 1.** <sup>a,b</sup>Data distributions with different letters are significantly different ( $P <$   
286 0.001). See Fig 1 for remainder of key.

287 FDPs, Fibrin-fibrinogen degradation products.

288

289 **Fig 3. Tukey boxplots of plasma and pleural effusion D-dimer concentrations of the 33 dogs**  
290 **of group 1.** <sup>a,b</sup>Data distributions with different letters are significantly different ( $P < 0.001$ ). See  
291 Fig 1 for remainder of key.

292

293 **Fibrinogen, FDPs, D-dimer, frequency of PHF, CRP, and**  
294 **fibrinogen/CRP ratio**

295 Plasma fibrinogen concentrations (reference interval, 152 to 284 <sup>69</sup> mg/dL) were  
296 significantly ( $P < 0.001$ ) higher in group 1 (mean  $\pm$  SD, 469.21  $\pm$  289.88 mg/dL; 95% CI, 366.43  
297 to 572.00 mg/dL) versus group 2 (mean  $\pm$  SD, 223.52  $\pm$  58.55 mg/dL; 95% CI, 202.75 to 244.28  
298 mg/dL), while they were not <sup>33</sup> significantly different ( $P = 0.559$ ) between group 1 and group 3  
299 (mean  $\pm$  SD, 395.79  $\pm$  204.21 mg/dL; 95% CI, 323.28 to 468.20 mg/dL). Plasma fibrinogen  
300 concentrations were also significantly ( $P < 0.001$ ) lower for group 2 versus group 3; (Fig 4).

301 Plasma concentrations of FDPs (reference interval,  $< 5$   $\mu$ g/mL) were significantly higher  
302 ( $P < 0.001$ ) for group 1 (median, 5.55  $\mu$ g/mL; range, 0.83 to 108.47  $\mu$ g/mL) versus groups 2  
303 (median, 0.97  $\mu$ g/mL; range, 0.10 to 6.61  $\mu$ g/mL) and they were also significantly higher ( $P =$   
304 0.001) versus group 3 (median, 2.24  $\mu$ g/mL; range, 0.10 to 28.21  $\mu$ g/mL). Plasma concentrations  
305 of FDPs were also significantly ( $P = 0.001$ ) lower for group 2 versus group 3; (Fig 5).

306 Plasma D-dimer concentrations (reference interval 0.01 to 0.34  $\mu$ g/mL) were  
307 significantly higher ( $P < 0.001$ ) for group 1 (median, <sup>24</sup> 0.07  $\mu$ g/mL; range, 0.01 to 7.69  $\mu$ g/mL)  
308 versus group 2 (median, <sup>24</sup> 0.04  $\mu$ g/mL; range, 0.01 to 0.49  $\mu$ g/mL;  $P < 0.001$ ), while they were not  
309 significantly different (<sup>61</sup>  $P = 0.964$ ) between group 1 and group 3 (median, <sup>24</sup> 0.10  $\mu$ g/mL; range,  
310 0.01 to 0.88  $\mu$ g/mL). Plasma D-dimer concentrations were also significantly ( $P < 0.001$ ) lower  
311 for group 2 versus group 3; (Fig 6).

312 Primary hyperfibrinogenolysis (i.e., elevated plasma concentration of FDPs with a  
313 normal plasma D-dimer concentration) was detected for 13 (39.4%) dogs in <sup>33</sup> group 1, two (6.1%)

314 dogs in group 2, and eight (24.2%) dogs in group 3. Frequency of PHF was significantly ( $P =$   
315 0.002) higher for group 1 versus groups 2. There were no significant differences in frequency of  
316 PHF between group 1 and group 3 ( $P = 0.29$ ) and between group 2 and group 3 ( $P = 0.08$ ). Of  
317 the 13 dogs in group 1 with PHF, one had pleural effusion due to increased hydrostatic pressure,  
318 nine due to increased vascular permeability, two due to chylous effusion, and two due to  
319 haemorrhage. The only dog included in the study with a transudative pleural effusion due to  
320 decreased COP did not have PHF. Finally, of the 13 dogs in group 1 with PHF, one had  
321 concurrent hypofibrinogenemia. None of the 11 dogs in groups 2 or 3 with PHF had  
322 hypofibrinogenemia.

323 Serum CRP concentration (reference interval, 0.01 to 0.22 mg/dL) was significantly  
324 increased in group 1 (median, 5.31 mg/dL; range, 0.01 to 14.57 mg/mL) compared to group 2  
325 (median, 0.02 mg/dL; range, 0.01 to 0.08 mg/mL) and 3 (median, 0.51 mg/dL; range, 0.01 to  
326 10.78 mg/mL) ( $P < 0.001$  for both comparison). Serum CRP concentration was also significantly  
327 lower for group 2 versus group 3 ( $P < 0.001$ ); (Fig 7).

328 Serum fibrinogen/CRP ratio was significantly decreased in group 1 (median, 82 mg/dL;  
329 range, 21 to 13600 mg/mL) compared to group 2 (median, 12250 mg/dL; range, 281 to 28400  
330 mg/mL) and 3 (median, 678 mg/dL; range, 50 to 41300 mg/mL) ( $P < 0.001$  for both  
331 comparison). Serum fibrinogen/CRP ratio was also significantly lower for group 2 versus group  
332 3 ( $P < 0.001$ ); (Fig 8).

333

334 **Fig 4. Tukey boxplots of plasma fibrinogen concentrations from dogs with pleural effusion**  
335 **(n = 33), healthy dogs (33), and sick dogs without pleural effusion (33).<sup>a,b</sup>** Data distributions

336 with different letters are significantly different ( $P < 0.001$  for both comparisons). See Fig 1 for  
337 remainder of key.

a b c

338

339 **Fig 5. Tukey boxplots of plasma FDP concentrations from dogs with pleural effusion (n =**  
340 **33), healthy dogs (33), and sick dogs without pleural effusion (33).** <sup>a,b,c</sup>Data distributions with  
341 different letters are significantly different ( $P < 0.001$  for “a,b” comparison;  $P = 0.001$  for “a,c”  
342 and “b,c” comparisons). See Fig 1 for remainder of key.

343

344 **Fig 6. Tukey boxplots of plasma D-dimer concentrations from dogs with pleural effusion (n**  
345 **= 33), healthy dogs (33), and sick dogs without ascites (33).** <sup>a,b</sup>Data distributions with different  
346 letters are significantly different ( $P < 0.001$  for both comparisons). In the graph, in group 1, it is  
347 missing an extreme outlier with a value of 7.69. See Fig 1 for remainder of key.

348

349 **Fig 7. Tukey boxplots of plasma CRP concentrations from dogs with pleural effusion (n =**  
350 **33), healthy dogs (33), and sick dogs without ascites (33).** <sup>a,b,c</sup>Data distributions with different  
351 letters are significantly different ( $P < 0.001$  for all comparisons). See Fig 1 for remainder of key.  
352 CRP, C-reactive protein.

353

354 **Fig 8. Tukey boxplots of plasma fibrinogen/CRP ratio from dogs with pleural effusion (n =**  
355 **33), healthy dogs (33), and sick dogs without ascites (33).** <sup>a,b,c</sup>Data distributions with different  
356 letters are significantly different ( $P < 0.001$  for all comparisons). See Fig 1 for remainder of key.  
357 CRP, C-reactive protein.

358

## 359 Discussion

360 The primary aim of this cohort study was to investigate whether coagulation and  
 361 fibrinogenolytic/fibrinolytic activity occurs in any type of canine pleural effusion. The results of  
 362 the current study show that a) in the pleural effusion of dogs, there is evidence of coagulation  
 363 activation and fibrinolysis in every case, and b) this phenomenon occurs independently of the  
 364 underlying mechanism that leads to pleural effusion formation.

365 The first statement is supported by the finding that fibrinogen concentrations in dogs are  
 366 undetectable and significantly lower in the pleural effusion, in comparison to plasma, while  
 367 FDPs and D-dimer pleural fluid concentrations are significantly higher than those in the plasma.  
 368 Taken together, these results would suggest that fibrinogen, upon entrance into the pleural cavity,  
 369 is converted into cross-linked fibrin and then lysed to form FDPs and D-dimer, or that some  
 370 fibrinogen, fibrin monomer or polymers may get lysed even before being transformed in cross-  
 371 linked fibrin in FDPs. This latter hypothesis would explain the few pleural effusions with  
 372 increased FDPs but with D-dimer concentrations lower than the plasma reference interval or  
 373 lower compared to their corresponding plasma value. Similar conclusions have been reached by  
 374 experiments in a canine model [27,37] and in the human clinical setting [38-40].

375 To assess if the fibrinogenolytic/fibrinolytic activity of the pleural fluid is independent of  
 376 the type of pleural effusion, we included in this study effusions formed secondary to five  
 377 different pathophysiological mechanisms of fluid formation (i.e., transudates due to increased  
 378 hydrostatic pressure, transudates due to decreased COP, exudates, chylous and hemorrhagic  
 379 pleural effusions). In the 33 included cases, the pleural fluid fibrinogen concentrations were  
 380 lower than their corresponding plasma concentrations, and in all cases at least one of the  
 381 fibrin/fibrinogenolytic markers in the pleural effusions were above the reference interval of what



382 is considered normal in a plasma sample and higher than their corresponding plasma values.  
383 These findings confirm that the fibrinogenolytic/fibrinolytic activity of pleural effusion is  
384 independent of the underlying mechanism of its formation. Therefore, pleural effusions have  
385 inherent fibrin/fibrinogenolytic activity, as has been shown in the case for human [26,41,42], and  
386 ascitic equine fluid [43]. In addition, in a recent study on dogs with ascites formed secondary to  
387 different pathophysiological mechanisms, we found that also canine abdominal effusions have  
388 the same inherent fibrin/fibrinogenolytic activity [44]. The hypothesis that pleural fluid is  
389 inherently fibrinolytic is also supported not only by the clinical observation that pleural effusions  
390 rarely form clots *in vivo*, but also by several studies. The first study on the topic was conducted  
391 in 1916 and showed that the inoculation of blood or of a solution containing fibrinogen and  
392 thrombin into the pleural cavity of dogs caused the activation of the coagulation system followed  
393 by rapid fibrinogenolysis/fibrinolysis, allowing the inoculated blood to remain fluid to a large  
394 extent [27]. These initial findings were later confirmed by another experimental study in dogs  
395 [37], and by studies in humans with hemothorax [45,46], and by other studies including patients  
396 with different types of pleural effusion [47,48]. The activation of plasminogen in the pleural  
397 effusion, responsible for the documented fibrinogenolysis/fibrinolysis, may be caused by the  
398 presence of tissue plasminogen activator, urinary plasminogen activator, both enzymes, or other  
399 fibrinolytic enzymes [46,48], which can be released (from a preformed storage pool) or leak into  
400 the pleural fluid (following the damage induced by the disease causing the pleural effusion) from  
401 the mesothelial and submesothelial endothelium, inflammatory or neoplastic cells.

402 The secondary aim of this cohort study was to determine if systemic clotting  
403 abnormalities suggesting PHF (i.e., elevated plasma FDPs with a normal D-dimer concentration)  
404 occur in dogs with pleural effusion, and whether a possible inflammatory process present in



405 these dogs may have activated the hemostatic cascade, along with its intrinsically linked  
406 secondary hyperfibrinolysis, possibly masking this phenomenon. The results show that a) PHF,  
407 according to our definition, <sup>2</sup> occurs significantly more often in dogs with pleural effusion  
408 compared to healthy dogs, and b) although there was also a trend for increased PHF in dogs with  
409 pleural effusion compared to sick dogs, this difference did not reach significance. Nevertheless,  
410 the plasma fibrinogen concentration in dogs with pleural effusion was similar to sick control  
411 dogs (Fig 4), despite a significantly increased serum CRP concentration in comparison to these  
412 dogs (Fig 6). The resulting significant decrease in the fibrinogen/CRP ratio <sup>64</sup> in dogs with pleural  
413 effusion compared to the sick control group, in the face of higher FDPs concentration and a <sup>2</sup>  
414 similar D-dimer concentration, would suggest that PHF is also more frequent in dogs with  
415 pleural effusion compared to sick control dogs. Therefore, similarly to dogs with ascites [23],  
416 dogs with pleural effusion are at increased risk of PHF, which is the cause of the relative (in  
417 comparison to their inflammatory state) decreased fibrinogen concentration observed in these  
418 dogs.

419 In a recent study on dogs with ascites, we found that PHF occurred with different frequency  
420 in all dogs with ascites. Moreover, we found that PHF was statistically more frequent in dogs with  
421 ascites <sup>49</sup> secondary to an increase in hydrostatic pressure compared to dogs in which the ascites  
422 formed secondary to another pathophysiological method. In addition, dogs with ascites  
423 <sup>49</sup> secondary to an increase in hydrostatic pressure were the only dogs to have a statistically more  
424 frequent PHF in comparison to both healthy and sick dogs without ascites [23]. The results of  
425 this study showed that PHF also occurred with different frequency in all dogs with pleural  
426 effusion, with the exception of the dogs in which pleural effusion formed secondary to decreased  
427 colloid osmotic pressure. Due to the small number of dogs with pleural effusion included in this

428 study, statistical analysis to assess if different types of pleural effusion were associated more  
429 frequently with PHF was not carried out. Furthermore, our search in the human medical literature  
430 found no studies evaluating this issue.

431 It is interesting to note that two (6.1%) of the healthy dogs had findings consistent with a  
432 diagnosis of PHF, but all of them only had mild elevations in FDPs, with normal plasma  
433 fibrinogen concentrations. Similar findings have been found in a recent study in a different  
434 healthy canine population [23]. Therefore, it is possible that the definition we adopted for PHF is  
435 not 100% specific for diagnosing PHF and that more stringent criteria might be required.  
436 However, it is also possible that some of our healthy animals had occult/subclinical disease  
437 resulting in PHF or that low grade PHF could be a physiological feature detectable with our  
438 definition of PHF.

439 In the normal state, the <sup>10</sup>pleural space is a dynamic compartment in which fluids,  
440 <sup>10</sup>electrolytes and proteins are continuously exchanged, with the <sup>10</sup>net direction of this flux being  
441 from the parietal pleural capillaries, through the pleural space and into the visceral pleural  
442 capillaries and lymphatics. In the pathological state, pleural fluid accumulates within the thoracic  
443 cavity when more fluid enters the pleural space than is removed [49,50]. Therefore, pleural fluid,  
444 which has traditionally been regarded by physicians as an inert fluid, contains all of the  
445 <sup>47</sup>proteins/enzymes that are present in plasma, including those that participate in coagulation and  
446 fibrinolysis [39]. Plasma coagulation-relevant proteins in pleural fluids are no longer contained  
447 in their natural environment (i.e. blood vessels), but are in a relatively acellular environment (i.e.  
448 the pleural space). They are also not exposed to the vascular endothelium where, according to the  
449 <sup>52</sup>cell-based model of hemostasis, in which tissue factor-bearing cells and platelets are necessary  
450 <sup>52</sup>for the three steps (initiation, amplification and propagation) of hemostasis [51], their actions

451 would no longer be well-regulated. This lack of regulation could result in the formation of a fluid  
452 with an inherently increased fibrinogen/fibrinolytic activity, as already demonstrated to be the  
453 case for ascitic fluid [23,26,41,42]. The increased frequency of PHF documented in this study in  
454 dogs with pleural effusion, compared to healthy dogs or sick dogs without pleural effusion,  
455 might possibly be explained by the fibrinolytic activity of all types of pleural effusion, which  
456 upon re-entering the systemic circulation via the thoracic duct and the pulmonary veins might  
457 possibly <sup>1</sup> contribute to the systemic hyperfibrinolytic state found in 39.4% of our dogs with  
458 pleural effusion.

459 <sup>1</sup> One limitation of the current study is that the pleural fibrinogen, FDP, and D-dimer  
460 concentrations were measured using kits that had been validated only in canine plasma samples  
461 and not in canine pleural effusion samples. Nevertheless, several studies in humans and horses  
462 also used plasma validated kits for fibrinogen, <sup>63</sup> FDPs, and D-dimer for the determination of these  
463 analytes in intracavitary effusions, <sup>1</sup> without apparent problems [41-43]. A second limitation of the  
464 current study is that PHF was diagnosed indirectly, by measuring FDPs and D-dimer [4,8,9],  
465 while fibrinolytic enzymes responsible for PHF such as plasmin, serum tryptase, or non-plasminic  
466 polymorphonuclear elastase were not measured [2,8-10], neither in the pleural effusion nor in the  
467 plasma. Therefore, it may be argued that the increased FDP plasma concentrations are the result  
468 of their reabsorption from the pleural fluid rather than de novo formation in the plasma  
469 secondary to a systemic PHF. However, despite the possibility that some the plasma FDPs in  
470 dogs with pleural effusion originate from the pleural effusion, this does not explain the  
471 discrepancy found between their <sup>54</sup> plasma FDPs and plasma D-dimer. In fact, if <sup>54</sup> plasma FDP and  
472 D-dimer concentrations were derived only from the pleural fluid, we would expect both of them  
473 to be increased in a similar proportion since, as demonstrated in this study, both pleural effusion

474 <sup>1</sup> FDPs and D-dimer concentrations were almost always higher than the plasma reference interval.  
475 Conversely, plasma FDPs were increased in 18 of these dogs, while plasma D-dimer was  
476 increased in only five cases (data not shown).

477

## 478 Conclusions

479 In summary, we have shown that pleural effusions <sup>1</sup> have fibrinolytic activity independent  
480 of the underlying mechanism of intra-thoracic fluid accumulation, and we also demonstrated that  
481 almost 40% of these dogs have systemic coagulative alterations suggesting PHF. The true  
482 frequency of PHF in dogs with pleural effusion could have been underestimated in this study due  
483 to the concurrent presence of secondary hyperfibrinolysis caused by the inflammatory disease  
484 underlying the cause of pleural effusion formation, as suggested from the significant decrease in  
485 fibrinogen/CRP ratio <sup>2</sup> in the face of a higher FDPs and similar D-dimer concentrations <sup>71</sup> in dogs  
486 with pleural effusions compared to control dogs. These results should support the screening of  
487 the systemic coagulative state in all dogs with pleural effusion in order to identify those with  
488 PHF. Future studies should assess the risk of bleeding in dogs with PHF and pleural effusion and  
489 should assess if these dogs may benefit from treatment with anti-fibrinolytic agents.  
490

491 **Author Contributions**

492 **Conceptualization:** AZ MD CJP PS <sup>45</sup>MC.

493 **Formal Analysis:** AZ MD MC.

494 **Funding Acquisition:** CJP MC.

495 **Investigation:** AZ MD CJP PS MC.

496 **Methodology:** AZ MD CJP PS <sup>45</sup>MC.

497 **Project Administration:** AZ CJP MC.

498 **Resources:** AZ MC.

499 **Supervision:** MD CJP PS MC.

500 **Writing – original draft:** AZ MD CJP PS MC.

501 **Writing – review & editing:** AZ MD CJP PS MC.

502



## 503    **References**

- 504    1. <sup>35</sup> Carey M, Cressey DM. Hyperfibrinolysis - is it common? Measurement and treatment  
505    including the role of thromboelastography. Clin Risk. 2009; 15: 188–191.
- 506    2. <sup>23</sup> Rodgers GM. Acquired coagulation disorders. In: Greer JP, Arber DA, Glader B, List AF,  
507    Means Jr. RT, Paraskevas F RG, editors. Wintrobe's Clinical Hematology. 13th ed.  
508    Lippincott Williams and Wilkins, WoltersKluwer Health; 2014. p. 1186–1217.
- 509    3. <sup>17</sup> Zorio E, Gilabert-Estellés J, España F, Ramón LA, Cosín R, Estellés A. Fibrinolysis: the  
510    key to new pathogenetic mechanisms. Curr Med Chem. 2008; 15: 923–929.
- 511    4. <sup>44</sup> Mazzi G, Raineri A, Lacava E, De Roia D, Santarossa L, Orazi BM. Primary  
512    hyperfibrinogenolysis in <sup>1</sup> a patient with anaphylactic shock. Haematologica. 1994; 79:  
513    283–285.
- 514    5. Sallah S, Gagnon GA. Reversion of primary hyperfibrinogenolysis in patients with  
515    hormone-refractory prostate cancer using docetaxel. Cancer Invest. 2000; 18: 191–196.
- 516    6. <sup>36</sup> Hunt BJ, Segal H. Hyperfibrinolysis. J Clin Pathol. 1996; 49: 958.
- 517    7. <sup>5</sup> Duran I, Tannock IF. Disseminated intravascular coagulation as the presenting sign of  
518    metastatic prostate cancer. J Gen Intern Med. 2006; 21: C6-C8.
- 519    8. <sup>19</sup> Sato N, Takahashi H, Shibata A. Fibrinogen/fibrin degradation products and D-dimer in  
520    clinical practice: interpretation of discrepant results. Am J Hematol. 1995; 48: 168–174.
- 521    9. <sup>13</sup> Song KS, Kim YA, Kim HK, Park Q. Incidence and possible reasons for discordant  
522    results between positive FDP and negative D-dimer latex assays in clinical specimens.  
523    Yonsei Med J. 1999; 40: 107–111.
- 524    10. <sup>30</sup> Lombardini C, Helia RE, Boehlen F, Merlani P. “Heparinization” and  
525    hyperfibrinogenolysis by wasp sting. Am J Emerg Med. 2009; 27: 1176.e1-3.



- 526 11. von Sommoggy S, Fraunhofer S, Wahba A, Blümel G, Maurer PC. Coagulation in  
527 aortofemoral bifurcation bypass grafting. *Eur J Vasc Surg.* 1991; 5: 247–253.
- 528 12. Blankensteijn JD, Schalm SW, Terpstra OT. New aspects of heterotopic liver  
529 transplantation. *Transpl Int.* 1992; 5: 43–50.
- 530 13. García Frade LJ, Sureda A, Torrado MC, García Avello A. High plasma urokinase-type  
531 plasminogen activator levels are present in patients with acute nonlymphoblastic  
532 leukemia. *Acta Haematol.* 1992; 88: 7–10.
- 533 14. Okajima K, Kohno I, Tsuruta J, Okabe H, Takatsuki K, Binder BR. Direct evidence for  
534 systemic fibrinogenolysis in a patient with metastatic prostatic cancer. *Thromb Res.* 1992;  
535 66: 717–727.
- 536 15. Violi F, Ferro D, Basili S, Quintarelli C, Musca A, Cordova C, Balsano F.  
537 Hyperfibrinolysis resulting from clotting activation in patients with different degrees of  
538 cirrhosis. The CALC Group. Coagulation Abnormalities in Liver Cirrhosis. *Hepatology.*  
539 1993; 17: 78–83.
- 540 16. Scott-Coombes DM, Whawell SA, Vipond MN, Crnojevic L, Thompson JN. Fibrinolytic-  
541 Activity of Ascites Caused by Alcoholic Cirrhosis and Peritoneal Malignancy. *Gut.* 1993;  
542 34: 1120–1122.
- 543 17. Schölmerich J, Zimmermann U, Köttgen E, Volk BA, Hasler C, Wilms H, et al. Proteases  
544 and antiproteases related to the coagulation system in plasma and ascites. Prediction of  
545 coagulation disorder in ascites retransfusion. *J Hepatol.* 1988; 6: 359–363.
- 546 18. Patrassi GM, Martinelli S, Sturniolo GC, Cappellato MG, Vicariotto M, Girolami A.  
547 Fibrinolytic study in plasma and ascitic fluid of cirrhotic patients before and after ascites  
548 concentration; reinfusion technique. *Eur J Clin Invest.* 1985; 15: 161–165.

- 16  
549 19. Lévy VG, Opolon P, Pauleau N, Caroli J. Treatment of ascites by reinfusion of  
550 concentrated peritoneal fluid—review of 318 procedures in 210 patients. *Postgrad Med J*.  
551 1975; 51: 564–566.
- 29  
552 20. Levi M, Keller TT, van Gorp E, ten Cate H. Infection and inflammation and the  
553 coagulation system. *Cardiovasc Res*. 2003; 60: 26–39.
- 32  
554 21. Smith S. Overview of Hemostasis. In: Weiss DJ, Wardrop KJ, editors. *Schalm's*  
555 *Veterinary Hematology*. 6th ed. Wiley-Blackwell; 2010. p. 635–53.
- 1  
556 22. Zoia A, Augusto M, Drigo M, Caldin M. Evaluation of hemostatic and fibrinolytic  
557 markers in dogs with ascites attributable to right-sided congestive heart failure. *J Am Vet*  
558 *Med Assoc*. 2012; 241: 1336–1343.
- 58  
559 23. Zoia A, Drigo M, Simioni P, Caldin M, Piek CJ. Association between ascites and primary  
560 hyperfibrinolysis: A cohort study in 210 dogs. *Vet J*. 2017; 223: 12–20.
- 1  
561 24. Burgess LJ. Biochemical analysis of pleural, peritoneal and pericardial effusions. *Clin*  
562 *Chim Acta*. 2004; 343: 61–84.
- 1  
563 25. Kopcinovic LM, Culej J. Pleural, peritoneal and pericardial effusions - a biochemical  
564 approach. *Biochem medica*. 2014; 24: 123–137.
- 15  
565 26. Henderson JM, Stein SF, Kutner M, Wiles MB, Ansley JD, Rudman D. Analysis of  
566 Twenty-three plasma proteins in ascites. The depletion of fibrinogen and plasminogen.  
567 *Ann Surg*. 1980; 192: 738–742.
- 1  
568 27. Denny GP, Minot GR. The coagulation of blood in the pleural cavity. *Am J Physiol*. 1916;  
569 39: 455–458.
- 1  
570 28. Rose BD. Edematous states. In: Rose BD, Post TW, editors. *Clinical Physiology of Acid-*  
571 *base and Electrolyte Disorders*. New York: McGraw-Hill; 2001. p. 478–534.

- 26  
29. Grootendorst AF, van Wilgenburg MG, de Laat PH, van der Hoven B. Albumin abuse in  
intensive care medicine. *Intensive Care Med.* 1988; 14: 554–557.
- 31  
30. Navar PD, Navar LG. Relationship between colloid osmotic pressure and plasma protein  
concentration in the dog. *Am J Physiol.* 1977; 233: H295-298.
- 28  
31. Gabel JC, Scott RL, Adair TH, Drake RE, Traber DL. Errors in calculated oncotic  
pressure of dog plasma. *Am J Physiol.* 1980; 239: H810-812.
- 12  
32. Maskell NA, Butland RJ. BTS guidelines for the investigation of a unilateral pleural  
effusion in adults. *Thorax.* 2003; 58 Suppl 2: ii8-17.
- 48  
33. Skouras V, Kalomenidis I. Chylothorax: diagnostic approach. *Curr Opin Pulm Med.* 2010;  
16: 387-393.
- 14  
34. Fossum TW, Jacobs RM, Birchard SJ. Evaluation of cholesterol and triglyceride  
concentrations in differentiating chylous and nonchylous pleural effusions in dogs and  
cats. *J Am Vet Med Assoc.* 1986; 188: 49–51.
- 1  
35. Caldin M, Furlanello T, Lubas G. Validation of an immunoturbidimetric D-dimer assay in  
canine citrated plasma. *Vet Clin Pathol.* 2000; 29: 51–54.
- 25  
36. Martínez-Subiela S, Cerón JJ. Validación analítica de técnicas comerciales para la  
determinación de haptoglobina, proteína C reactiva y amiloide A sérico en caninos. *Arch*  
*Med Vet.* 2005; 37: 61–66.
- 6  
37. Napoli VM, Symbas PJ, Vroon DH, Symbas PN. Autotransfusion from experimental  
hemothorax: levels of coagulation factors. *J Trauma.* 1987; 27: 296–300.
- 51  
38. Glauser FL, Otis PT, Levine RI, Smith WR. In vitro pleural fluid clottability  
and fibrinogen content. *Chest.* 1975; 68: 205–208.
- 27  
39. Glauser FL, Otis PT, Levine RI, Smith WR. Coagulation factors and fibrinogen in pleural

- effusions. *Respiration*. 1976; 33: 396–402.
40. <sup>22</sup> Widström O, Kockum C, Nilsson BS. Fibrinogen, fibrin(ogen) degradation products and fibrinopeptide A in pleural effusions. High turnover of fibrinogen in pleurisy. *Scand J Respir Dis*. 1978; 59: 210–215.
41. <sup>1</sup> Agarwal S, Joyner KA Jr, Swaim MW. Ascites fluid as a possible origin for hyperfibrinolysis in advanced liver disease. *Am J Gastroenterol*. 2000; 95: 3218–324.
42. Diab SM, Fathy EM, Soliman HH, Zaghloul SG. Hyperfibrinolysis in Advanced Liver Disease : Does Ascites Have a Role ? *Arab J Gastroenterol*. 2005; 6: 124–130.
43. Delgado MA, Monreal L, Armengou L, Rios J, Segura D. Peritoneal D-dimer concentration for assessing peritoneal fibrinolytic activity in horses with colic. *J Vet Intern Med*. 2009; 23: 882–889.
44. Zoia A, Drigo M, Piek CJ, Simioni P, Caldin M. <sup>1</sup> Hemostatic Findings in Ascitic Fluid: A Cross-Sectional Study in 70 Dogs. <sup>1</sup> *J Vet Intern Med*. 2017; 31: 43-50.
45. <sup>6</sup> Broadie TA, Glover JL, Bang N, Bendick PJ, Lowe DK, Yaw PB, Kafoure D. Clotting competence of intracavitary blood in trauma victims. *Ann Emerg Med*. 1981; 10: 127–130.
46. <sup>34</sup> Schved JF, Gris JC, Gilly D, Joubert P, Eledjam JJ, D'Athis F. [Fibrinolytic activity in traumatic hemothorax fluids]. *Ann Fr d'anesthésie réanimation*. 1991; 10: 104–107.
47. <sup>4</sup> Idell S, Girard W, Koenig KB, McLarty J, Fair DS. Abnormalities of pathways of fibrin turnover in the human pleural space. *Am Rev Respir Dis*. 1991; 144: 187–194.
48. Philip-Joët F, Alessi MC, Philip-Joët C, Aillaud M, Barriere JR, Arnaud A, Juhan-Vague I. Fibrinolytic and inflammatory processes in pleural effusions. *Eur Respir J*. 1995; 8: 1352–1356.

- 618 49. <sup>38</sup> Boggs DS, Kinasewitz GT. Review: pathophysiology of the pleural space. Am J Med Sci.  
619 1995; 309: 53–59.
- 620 50. <sup>37</sup> Porcel JM, Light RW. Diagnostic approach to pleural effusion in adults. Am Fam  
621 Physician. 2006; 73: 1211–1220.
- 622 51. <sup>41</sup> Hoffman M, Monroe DM 3rd. A Cell-based Model of Hemostasis. Thromb Haemost.  
623 2001; 85: 958–965.
- 624

# Hemostatic findings of 12.01.2018

---

## ORIGINALITY REPORT

---

38%

SIMILARITY INDEX

%

INTERNET SOURCES

38%

PUBLICATIONS

%

STUDENT PAPERS

---

## PRIMARY SOURCES

---

1

A. Zoia, M. Drigo, C.J. Piek, P. Simioni, M. Caldin. "Hemostatic Findings in Ascitic Fluid: A Cross-Sectional Study in 70 Dogs", Journal of Veterinary Internal Medicine, 2017

Publication

15%

2

"Research Communications of the 24th ECVIM-CA Congress", Journal of Veterinary Internal Medicine, 2015.

Publication

5%

3

Silvestrini, P., A. Zoia, M. Planellas, X. Roura, J. Pastor, J. J. Cerón, and M. Caldin. "Iron status and C-reactive protein in canine leishmaniasis", Journal of Small Animal Practice, 2014.

Publication

1%

4

Karandashova, S., G. Florova, A. O. Azghani, A. A. Komissarov, K. Koenig, T. A. Tucker, T. C. Allen, K. Stewart, A. Tvinnereim, and S. Idell. "Intrapleural Adenoviral Delivery of Human PAI-1 Exacerbates TCN-Induced Pleural Injury in Rabbits", American Journal of Respiratory Cell and Molecular Biology, 2012.

1%



5

Wada, Yoshihiro, Mitsuhiro Uchiba, Yoshiaki Kawano, Nobuyuki Kai, Wataru Takahashi, Jiro Honda, Ken-ichiro Tanoue, Yoshihiro Maeda, Yoji Murakami, Masatoshi Eto, and Takahisa Imamura. "Severe bleeding tendency caused by a rare complication of excessive fibrinolysis with disseminated intravascular coagulation in a 51-year-old Japanese man with prostate cancer: a case report", Journal of Medical Case Reports, 2012.

Publication

---

6

Singh, Jasveer, Dheeraj Kapoor, and Manpreet Singh. "Autologous transfusion in a patient with life threatening traumatic haemothorax: Case Report.", Bangladesh Journal of Medical Science, 2013.

Publication

---

7

Zoia, Andrea, and Marco Caldin. "Coagulation status in dogs with naturally occurring Angiostrongylus vasorum infection and primary hyperfibrinolysis : Primary hyperfibrinolysis and angiostrongylosis", Journal of Small Animal Practice, 2015.

Publication

---

8

Spadaro, Aldo. "High circulating D-dimers are associated with ascites and hepatocellular

1 %

1 %

1 %

&lt;1 %

carcinoma in liver cirrhosis", World Journal of Gastroenterology, 2008.

Publication

9

"Large-volume Paracentesis versus Dialytic Ultrafiltration in the Treatment of Cirrhotic Ascites", QJM: An International Journal of Medicine, 1991

Publication

<1 %

10

F. Glauser. "In vitro pleural fluid clottability and fibrinogen content", Chest, 08/01/1975

Publication

<1 %

11

Tvarijonaviciute, A.. "Adiponectin and IGF-1 are negative acute phase proteins in a dog model of acute endotoxaemia", Veterinary Immunology and Immunopathology, 20110315

Publication

<1 %

12

E. E. McGrath. "A systematic approach to the investigation and diagnosis of a unilateral pleural effusion : Diagnosis of unilateral pleural effusion", International Journal of Clinical Practice, 10/09/2009

Publication

<1 %

13

Hiromitsu Kitayama, Tomohiro Kondo, Junko Sugiyama, Kazutomo Kurimoto, Yasuhiro Nishino, Michiaki Hirayama, Yasushi Tsuji. "Venous thromboembolism in hospitalized patients receiving chemotherapy for

<1 %

malignancies at Japanese community hospital: prospective observational study", BMC Cancer, 2017

Publication

---

14

Jonathan F. McAnulty. "Prospective Comparison of Cisterna Chyli Ablation to Pericardectomy for Treatment of Spontaneously Occurring Idiopathic Chylothorax in the Dog : Comparison of Cisterna Chyli Ablation to Pericardectomy", Veterinary Surgery, 09/2011

<1 %

Publication

---

15

Cardile, Anthony P, Carlos J Sanchez, Meghan E Samberg, Desiree R Romano, Sharanda K Hardy, Joseph C Wenke, Clinton K Murray, and Kevin S Akers. "Human plasma enhances the expression of Staphylococcal microbial surface components recognizing adhesive matrix molecules promoting biofilm formation and increases antimicrobial tolerance In Vitro", BMC Research Notes, 2014.

<1 %

Publication

---

16

"Peritoneovenous Shunting for Ascites", New England Journal of Medicine, 08/21/1980

<1 %

Publication

---

17

C. Yenilmez, Z. Ozdemir Koroglu, H. Kurt, M. Yanas, E. Colak, I. Degirmenci, H. V. Gunes. "A

<1 %

study of the possible association of plasminogen activator inhibitor type 1 4G/5G insertion/deletion polymorphism with susceptibility to schizophrenia and in its subtypes", Journal of Clinical Pharmacy and Therapeutics, 2017

Publication

---

18

Palmieri, Maria, Stefano Berrettini, Francesca Forli, Patrizia Trevisi, Elisabetta Genovese, Anna Maria Chilosì, Edoardo Arslan, and Alessandro Martini. "Evaluating Benefits of Cochlear Implantation in Deaf Children With Additional Disabilities :", Ear & Hearing, 2012.

<1 %

Publication

---

19

Madarame, Haruhiko, Miwa Kurano, Kazuya Fukumura, Taira Fukuda, and Toshiaki Nakajima. "Haemostatic and inflammatory responses to blood flow-restricted exercise in patients with ischaemic heart disease: a pilot study", Clinical Physiology and Functional Imaging, 2013.

<1 %

Publication

---

20

"Research Communications of the 25th ECVIM-CA Congress", Journal of Veterinary Internal Medicine, 2015.

<1 %

Publication

---

21

D. Scott-Coombes. "Human intraperitoneal

<1 %

fibrinolytic response to elective surgery", British Journal of Surgery, 03/1995

Publication

---

22

Widstrom, O.. "Fibrinolytic and coagulation mechanisms in stages of inflammation: A study of BCG-induced pleural exudate in guinea pig", Thrombosis Research, 19830301

<1 %

Publication

---

23

Milena S. Espíndola, Luana S. Soares, Leonardo J. Galvão-Lima, Fabiana A. Zambuzi, Maira C. Cacemiro, Verônica S. Brauer, Fabiani G. Frantz. "HIV infection: focus on the innate immune cells", Immunologic Research, 2016

<1 %

Publication

---

24

G. Koren. "A Systematic Review of Lidocaine-Prilocaine Cream (EMLA) in the Treatment of Acute Pain in Neonates", PEDIATRICS, 02/01/1998

<1 %

Publication

---

25

Klenner, S., N. Bauer, and A. Moritz. "Evaluation of Three Automated Human Immunoturbidimetric Assays for the Detection of C-Reactive Protein in Dogs", Journal of Veterinary Diagnostic Investigation, 2010.

<1 %

Publication

---

26

J-P Yared. "Albumin vs. non-protein colloids for fluid resuscitation: does it matter?", Clinical

<1 %

27

Idell, S., W. Girard, K. B. Koenig, J. McLarty, and D. S. Fair. "Abnormalities of Pathways of Fibrin Turnover in the Human Pleural Space", American Journal of Respiratory and Critical Care Medicine, 1991.

Publication

<1 %

28

Page R Painter. Theoretical Biology and Medical Modelling, 2005

Publication

<1 %

29

B. W. J. Hellebrekers. "Pathogenesis of postoperative adhesion formation", British Journal of Surgery, 11/2011

Publication

<1 %

30

Management of Bleeding Patients, 2016.

Publication

<1 %

31

David T. Runk. "Measurement of Plasma Colloid Osmotic Pressure in Normal Thoroughbred Neonatal Foals", Journal of Veterinary Internal Medicine, 09/2000

Publication

<1 %

32

V. E. O. (Ted) Valli, Matti Kiupel, Dorothee Bienzle, R. Darren Wood. "Hematopoietic System", Elsevier BV, 2016

Publication

<1 %



33

Adam Auckburally. "A comparison of induction of anaesthesia using a target-controlled infusion device in dogs with propofol or a propofol and alfentanil admixture", *Veterinary Anaesthesia and Analgesia*, 07/2008

Publication

<1 %

34

Komissarov, A. A., G. Florova, A. Azghani, S. Karandashova, A. K. Kurdowska, and S. Idell. "Active  $\alpha$ -macroglobulin is a reservoir for urokinase after fibrinolytic therapy in rabbits with tetracycline-induced pleural injury and in human pleural fluids.", *AJP Lung Cellular and Molecular Physiology*, 2013.

Publication

<1 %

35

"Abstracts of free papers presented at the annual meeting of the Obstetric Anaesthetists' Association, Edinburgh, 26 - 27 May 2011", *International Journal of Obstetric Anesthesia*, 201105

Publication

<1 %

36

Momin, Takki A., Robyn A. Macsata, and Anton N. Sidawy. "Thrombogenesis and Thrombolysis", *Haimovici's Vascular Surgery Ascher/Haimovici's Vascular Surgery*, 2012.

Publication

<1 %

37

Karkhanis, Vinaya, and Jyotsna Joshi. "Pleural effusion: diagnosis, treatment, and

<1 %

management", Open Access Emergency  
Medicine, 2012.

Publication

38

D. Feller-Kopman. "Assessment of Pleural Pressure in the Evaluation of Pleural Effusions", Chest, 01/01/2009

<1 %

Publication

39

Yokokawa, Tetsuro, Yasuo Sugano, Akito Shimouchi, Atsushi Shibata, Naoya Jinno, Toshiyuki Nagai, Hideaki Kanzaki, Takeshi Aiba, Kengo Kusano, Mikiyasu Shirai, Yasuchika Takeishi, Satoshi Yasuda, Hisao Ogawa, and Toshihisa Anzai. "Exhaled Acetone Concentration Is Related to Hemodynamic Severity in Patients With Non-Ischemic Chronic Heart Failure", Circulation Journal, 2016.

<1 %

Publication

40

Tommaso Furlanello,. "Stability of stored canine plasma for hemostasis testing", Veterinary Clinical Pathology, 06/2006

<1 %

Publication

41

Stephen H. Caldwell. "Coagulation disorders and hemostasis in liver disease: Pathophysiology and critical assessment of current management", Hepatology, 10/2006

<1 %

Publication

42

CÜCE, Gökhan, SÖZEN, Mehmet Enes,

ÇETİNKAYA, Seda, CANBAZ, Halime Tuba, SEFLEK, Hatice and KALKAN, Serpil. "Effects of Nigella sativa L. seed oil on intima-media thickness and Bax and Caspase 3 expression in diabetic rat aorta", AVES Yayıncılık, 2016.

Publication

<1 %

43

Meléndez-Lazo, A., A. Tvarijonaviciute, J.J. Cerón, M. Planellas, and J. Pastor. "Evaluation of the Relationship between Selected Reticulocyte Parameters and Inflammation determined by Plasma C-reactive Protein in Dogs", Journal of Comparative Pathology, 2015.

Publication

<1 %

44

Ch. Pechlaner. "Plasminogen Activators in Inflammation and Sepsis", Acta Medica Austriaca, 7/2002

Publication

<1 %

45

Marnie L. Campbell. "Burial Duration and Frequency Influences Resilience of Differing Propagule Types in a Subtidal Seagrass, Posidonia australis", PLOS ONE, 2016

Publication

<1 %

46

Reddy, V.M.. "Hemodynamic Effects of Epinephrine, Bicarbonate and Calcium in the Early Postnatal Period in a Lamb Model of Single-Ventricle Physiology Created In Utero",

<1 %

47

Swati Agarwal. "Ascites fluid as a possible origin for hyperfibrinolysis in advanced liver disease", The American Journal of Gastroenterology, 11/2000

Publication

---

48

&NA;. "Current World Literature :", Current Opinion in Pulmonary Medicine, 09/2011

Publication

---

49

Zoia, A.. "A new approach to pleural effusion in cats: markers for distinguishing transudates from exudates", Journal of Feline Medicine and Surgery, 200910

Publication

---

50

Li, S.. "Gingival bleeding as a presenting sign of primary fibrinogenolysis", Oral Surgery, Oral Medicine, Oral Pathology, Oral Radiology and Endodontology, 201107

Publication

---

51

H. KOTHARI. "Plasmin enhances cell surface tissue factor activity in mesothelial and endothelial cells", Journal of Thrombosis and Haemostasis, 01/2009

Publication

---

Brian L. Henry. "Recent Research

<1 %

<1 %

<1 %

<1 %

<1 %

52

Developments in the Direct Inhibition of Coagulation Proteinases - Inhibitors of the Initiation Phase", Cardiovascular & Hematological Agents in Medicinal Chemistry (Formerly Current Medicinal Chemistry - Cardiovascular & Hematological Agents), 10/01/2008

Publication

&lt;1 %

53

V. Toschi, G.M. Rocchini, A. Motta, G.F. Fiorini, C. Cimminiello, F. Violi, C. Castelli, D. Sironi, A. Gibelli. "The hyperfibrinolytic state of liver cirrhosis: possible pathogenetic role of ascites", Biomedicine & Pharmacotherapy, 1993

Publication

&lt;1 %

54

Tracy Stokol. "Plasma D-dimer for the diagnosis of thromboembolic disorders in dogs", Veterinary Clinics of North America: Small Animal Practice, 2003

Publication

&lt;1 %

55

"Abstracts", Veterinary Dermatology, 11/2008

Publication

&lt;1 %

56

Pease, C. T., J. N. Fordham, M. M. Stubbs, and J. R. Archer. "IgA Antibodies to Gram-negative Bacteria in the Serum and Saliva of Patients with Ankylosing Spondylitis", Scandinavian Journal of Rheumatology, 1987.

Publication

&lt;1 %

57

N A Maskell. "BTS guidelines for the investigation of a unilateral pleural effusion in adults", Thorax, 5/1/2003

Publication

&lt;1 %

58

"Oral Research Communications of the 23rd ECVIM-CA Congress", Journal of Veterinary Internal Medicine, 2013.

Publication

&lt;1 %

59

Zhang, Xiang-Hui, Mei Zhang, Jia He, Yi-Zhong Yan, Jiao-Long Ma, Kui Wang, Ru-Lin Ma, Heng Guo, La-Ti Mu, Yu-Song Ding, Jing-Yu Zhang, Jia-Ming Liu, Shu-Gang Li, Qiang Niu, Dong-Sheng Rui, and Shu-Xia Guo.  
"Comparison of Anthropometric and Atherogenic Indices as Screening Tools of Metabolic Syndrome in the Kazakh Adult Population in Xinjiang", International Journal of Environmental Research and Public Health, 2016.

Publication

&lt;1 %

60

Shigeki Kushimoto. "Implications of Fibrinogenolysis in Patients with Closed Head Injury", Journal of Neurotrauma, 04/2003

Publication

&lt;1 %

61

KORKMAZ, Özlem, GÖKŞEN, Damla, ÖZEN, Samim and DARCAN, Şükran. "Is anti-Mullerian hormone an indicator of potential

&lt;1 %



polycystic ovary syndrome in prepubertal girls with simple obesity?", Türk Pediatri Derneği, 2016.

Publication

---

62

L SOLANO-GALLEGO. "Molecular Survey of Ehrlichia canis and Anaplasma phagocytophilum from Blood of Dogs in Italy", Annals of the New York Academy of Sciences, 10/01/2006

<1 %

Publication

---

63

Furlanello, T.. "Clinicopathological findings in naturally occurring cases of babesiosis caused by large form Babesia from dogs of northeastern Italy", Veterinary Parasitology, 20051125

<1 %

Publication

---

64

YILMAZ, Zeki, KOCATÜRK, Meriç, ERALP İNAN, Oya and LEVENT, Pınar.

"Thromboelastographic evaluation of hemostatic function in dogs with dilated cardiomyopathy", TÜBİTAK, 2017.

<1 %

Publication

---

65

Ann Kristin Barton, Caroline Wirth, Angelika Bondzio, Ralf Einspanier, Heidrun Gehlen. "Are pulmonary hemostasis and fibrinolysis out of balance in equine chronic pneumopathies?", Journal of Veterinary Science, 2017

<1 %

Publication

---

66 Martinez-Subiela, S.. "Acute phase protein response in experimental canine leishmaniosis", Veterinary Parasitology, 20110825 <1 %

Publication

---

67 Planellas, Marta, Rafaela Cuenca, Maria-Dolores Tabar, Coralie Bertolani, Cyrill Poncet, Josep M Closa, Juan Lorente, Jose J Cerón, and Josep Pastor. "Evaluation of C-reactive protein, Haptoglobin and cardiac troponin 1 levels in brachycephalic dogs with upper airway obstructive syndrome", BMC Veterinary Research, 2012. <1 %

Publication

---

68 Alexandre Merlo. "Serum amyloid A is not a marker for relapse of multicentric lymphoma in dogs", Veterinary Clinical Pathology, 3/2008 <1 %

Publication

---

69 "WORLD TRANSPLANT CONGRESS 2006 POSTER ABSTRACTS", American Journal of Transplantation, 8/2006 <1 %

Publication

---

70 Block, Darci R., and Alicia Algeciras-Schimnich. "Body fluid analysis: Clinical utility and applicability of published studies to guide interpretation of today's laboratory testing in serous fluids", Critical Reviews in Clinical <1 %

71

ER, Cenk and OK, Mahmut. "Levels of Cardiac Biomarkers and Coagulation Profiles in ", Kafkas Üniversitesi, 2015.

Publication

<1%

Exclude quotes Off

Exclude bibliography Off

Exclude matches Off
